# Supplementary material for: Linkage of cDNA expression profiles of mesencephalic dopaminergic neurons to a genome-wide in situ hybridization database
Source: PubMed Central journal article supplement (PMC2637272; doi:10.1186/1750-1326-4-6), 2009-01-29
Supplement: 1750-1326-4-6-S1.pdf [file 1750-1326-4-6-S1.pdf]

| Gene Name                                                               | Gene Symbol   | Serial # | Screen  | Accession #  |
|-------------------------------------------------------------------------|---------------|----------|---------|--------------|
| myosin X                                                                | Myo10         | 37       | Thuret  | NM_019472    |
| actin, beta, cytoplasmic                                                | Actb          | 44       | Thuret  | NM_007393    |
| in locus of RIKEN cDNA C130076O07 gene                                  | C130076O07Rik | 58       | Thuret  |              |
| complexin I                                                             | Cplx1         | 64       | Thuret  | NM_007756    |
| in locus of contactin associated protein 4 (Cntnap4)                    | Cntnap4       | 66       | Thuret  | NM_130457    |
| similar to Ac1147                                                       | LOC385068     | 95       | Thuret  |              |
| myeloid/lymphoid or mixed-lineage leukemia 1                            | Mll1          | 100      | Thuret  | XM_110671    |
| morf4 family associated protein 1                                       | Mrfap1        | 104      | Thuret  | NM_026242    |
| pyridoxal (pyridoxine, vitamin B6) phosphatase                          | Pdpx          | 118      | Thuret  | NM_020271    |
| polo-like kinase 1 (Drosophila)                                         | Plk1          | 123      | Thuret  | NM_011121    |
| Rap2 interacting protein                                                | Rap2ip        | 127      | Thuret  |              |
| RAN GTPase activating protein 1                                         | Rangap1       | 128      | Thuret  | NM_011241    |
| roundabout homolog 1 (Drosophila)                                       | Robo1         | 136      | Thuret  | NM_019413    |
| signal-induced proliferation-associated 1 like 1                        | Sipa1l1       | 145      | Thuret  | NM_172579    |
| SWI/SNF related, matrix associated, actin dependent regulator of chrom  | smarca2       | 150      | Thuret  | NM_011416    |
| synaptotagmin 1                                                         | Syt1          | 155      | Thuret  | NM_009306    |
| thymidine kinase 2, mitochondrial                                       | Tk2           | 161      | Thuret  | NM_021028    |
|                                                                         | 4930431J08Rik | 283      | Thuret  |              |
|                                                                         | 5830434P21Rik | 284      | Thuret  |              |
| insulin-like growth factor binding protein-like 1                       | Igfbpl1       | 375      | Thuret  | NM_018741    |
|                                                                         | A230057G18Rik | 393      | Thuret  |              |
|                                                                         | Azi2          | 394      | Thuret  |              |
| hydroxysteroid (17-beta) dehydrogenase 12                               | Hsd17b12      | 3        | Steward | NM_019657    |
| Bcl2-associated athanogene 1                                            | Bag1          | 24       | Steward | NM_009736    |
| RIKEN cDNA 1110059H15 gene                                              | 1110059H15Rik | 38       | Steward | XM_981951    |
| transmembrane protein 66                                                | Tmem66        | 39       | Steward | NM_026432    |
| OTU domain containing 6B                                                | Otud6b        | 42       | Steward | NM_152812    |
| acyl-CoA synthetase long-chain family member 3                          | Acsf3         | 46       | Steward | NM_001033606 |
| ARP2 actin-related protein 2 homolog                                    | Actr2         | 47       | Steward | NM_146243    |
| ADP-ribosylation factor guanine nucleotide-exchange factor 2 (brefeldin | Arfgef2       | 50       | Steward | XM_130646    |
| ATPase, H+ transporting, lysosomal 16kD, V0 subunit C                   | Atp6v0c       | 51       | Steward | NM_009729    |
| ATPase, H+ transporting, V1 subunit E isoform 1                         | Atp6v1e1      | 52       | Steward | NM_007510    |
| ATPase, H+ transporting, V1 subunit A, isoform 1                        | Atp6v1a       | 53       | Steward | NM_007508    |

|                                                                          |               |     |         |              |
|--------------------------------------------------------------------------|---------------|-----|---------|--------------|
| RIKEN cDNA B430201A12 gene                                               | B430201A12Rik | 54  | Steward | XM_283903    |
| RIKEN cDNA B630019K06 gene                                               | B630019K06Rik | 55  | Steward | NM_175327    |
| cDNA sequence BC003498                                                   | Psd3          | 56  | Steward | NM_030263    |
| calmodulin 2                                                             | Calm2         | 59  | Steward | NM_007589    |
| calmodulin 3                                                             | Calm3         | 60  | Steward | NM_007590    |
| integrin alpha FG-GAP repeat containing 1                                | Itfg1         | 61  | Steward | NM_028007    |
| cholinergic receptor, nicotinic, beta polypeptide 3                      | Chrn3         | 63  | Steward | NM_027454    |
| coatamer protein complex, subunit gamma 2                                | Copg2         | 65  | Steward | NM_017478    |
| TSPY-like 4                                                              | Tspyl4        | 67  | Steward |              |
| DEAD (aspartate-glutamate-alanine-aspartate) box polypeptide 5           | Ddx5          | 72  | Steward | NM_007840    |
| dispatched homolog 2                                                     | Disp2         | 73  | Steward | NM_170593    |
| v-erb-a erythroblastic leukemia viral oncogene homolog 4 (avian)         | ErbB4         | 77  | Steward | XM_001002143 |
| in locus of gene model 528, (NCBI)                                       | Gm528         | 85  | Steward | XM_147716    |
| guanine nucleotide binding protein, beta 1                               | Gnb1          | 86  | Steward | NM_008142    |
| imprinted and ancient                                                    | Impact        | 89  | Steward | NM_008378    |
| kinesin family member 1A                                                 | Kif1a         | 90  | Steward | NM_008440    |
| kelch-like 9 (Drosophila)                                                | Klh9          | 91  | Steward | NM_172871    |
| large tumor suppressor 2                                                 | Lats2         | 92  | Steward | NM_015771    |
| LON peptidase N-terminal domain and ring finger 2                        | Lonrf2        | 93  | Steward | NM_001029878 |
| microtubule-associated protein, RP/EB family, member 1                   | Mapre1        | 98  | Steward | NM_007896    |
| microtubule-associated protein 1A                                        | Mtap1a        | 103 | Steward | XM_194040    |
| microtubule-associated protein 4                                         | Mtap4         | 106 | Steward | NM_008633    |
| 21 (CDKN1A)-activated kinase 1                                           | Pak1          | 116 | Steward | NM_011035    |
| protocadherin 10                                                         | Pcdh10        | 117 | Steward | NM_011043    |
| protein kinase inhibitor, alpha                                          | Pkia          | 122 | Steward | NM_008862    |
| protein kinase, cAMP dependent, catalytic, beta                          | Prkacb        | 126 | Steward | NM_011100    |
| reticulocalbin 2                                                         | Rcn2          | 129 | Steward | NM_011992    |
| ras homolog gene family, member A                                        | Rhoa          | 132 | Steward | NM_016802    |
| roundabout homolog 2 (Drosophila)                                        | Robo2         | 135 | Steward | NM_175549    |
| SAC1 (suppressor of actin mutations 1, homolog)-like (S. cerevisiae)     | Sacm1l        | 137 | Steward | NM_030692    |
| stearoyl-Coenzyme A desaturase 1                                         | Scd1          | 140 | Steward | NM_009127    |
| SEC23A (S. cerevisiae)                                                   | Sec23a        | 142 | Steward | NM_009147    |
| sema domain, transmembrane domain (TM), and cytoplasmic domain, (Sema6d) | Sema6d        | 144 | Steward | NM_172537    |
| solute carrier family 18 (vesicular monoamine), member 2                 | Slc18a2       | 146 | Steward | NM_172523    |
| solute carrier family 30 (zinc transporter), member 4                    | Slc30a4       | 147 | Steward | NM_011774    |
| solute carrier family 4, sodium bicarbonate cotransporter-like, member 1 | Slc4a10       | 149 | Steward | NM_033552    |

|                                                                                            |               |     |         |              |
|--------------------------------------------------------------------------------------------|---------------|-----|---------|--------------|
| synuclein, alpha                                                                           | SNCA          | 151 | Steward | NM_001042451 |
| synaptosomal-associated protein 91                                                         | Snap91        | 152 | Steward | NM_013669    |
| synaptic vesicle glycoprotein 2 b                                                          | Sv2b          | 154 | Steward | NM_153579    |
| synaptogyrin 3                                                                             | Syngn3        | 156 | Steward | NM_011522    |
| synaptotagmin 4                                                                            | Syt4          | 157 | Steward | NM_009308    |
| Tax1 (human T-cell leukemia virus type I) binding protein 1                                | Tax1bp1       | 158 | Steward | NM_025816    |
| thymosin, beta 4, X chromosome                                                             | Tmsb4x        | 163 | Steward | NM_021278    |
| thymosin, beta 10                                                                          | Tmsb10        | 164 | Steward | NM_025284    |
| UDP-glucose pyrophosphorylase 2                                                            | Ugp2          | 166 | Steward | NM_139297    |
| 3-monooxygenase/tryptophan 5-monooxygenase activation protein, gamma                       | Ywhag         | 170 | Steward | NM_018871    |
|                                                                                            | Cxx1a         | 392 | Steward |              |
| aldo-keto reductase family 1, member B3                                                    | Akr1b3        | 1   | Grimm   | NM_009658    |
| cholinergic receptor, nicotinic, alpha polypeptide 4                                       | Chrna4        | 9   | Grimm   | NM_015730    |
| glial cell line derived neurotrophic factor family receptor alpha 1                        | Gfra1         | 16  | Grimm   | NM_010279    |
| tyrosine hydroxylase                                                                       | Th            | 260 | Grimm   | NM_009377    |
| tyrosine hydroxylase                                                                       | Th            | 261 | Grimm   | NM_009377    |
| peripherin 1                                                                               | Prph1         | 307 | Grimm   | NM_013639    |
| dopa decarboxylase                                                                         | Ddc           | 308 | Grimm   | NM_016672    |
| pterin 4 alpha carbinolamine dehydratase/dimerization cofactor of hepatocellular carcinoma | Pcbd1         | 309 | Grimm   | NM_025273    |
| cell growth regulator with EF hand domain 1                                                | Cgref1        | 310 | Grimm   | XM_181420    |
| dopamine receptor D1 interacting protein                                                   | Drd1ip        | 311 | Grimm   | NM_026769    |
| protein arginine N-methyltransferase 2                                                     | Prmt2         | 312 | Grimm   | NM_133182    |
| TSPY-like 2                                                                                | Tspyl2        | 313 | Grimm   | NM_029836    |
| aldehyde dehydrogenase family 1, subfamily A1                                              | Aldh1a1       | 314 | Grimm   | NM_013467    |
| Down syndrome critical region gene 1-like 1                                                | Dscr1l1       | 315 | Grimm   | NM_030598    |
| RNA binding motif, single stranded interacting protein                                     | Rbms3         | 316 | Grimm   | NM_178660    |
| protein kinase C, alpha                                                                    | Prkca         | 317 | Grimm   | NM_011101    |
| RIKEN cDNA 2010011I20 gene                                                                 | 2010011I20Rik | 318 | Grimm   | NM_025912    |
| Ly6/Plaur domain containing 1                                                              | Lypd1         | 319 | Grimm   | NM_145100    |
| solute carrier family 39 (zinc transporter), member 4                                      | Slc39a4       | 320 | Grimm   | NM_028064    |
| serine (or cysteine) peptidase inhibitor, clade B, member 6a                               | Serpib6a      | 321 | Grimm   | NM_009254    |
| NEL-like 2 (chicken)                                                                       | Nell2         | 322 | Grimm   | NM_016743    |
| potassium voltage-gated channel, Shal-related family, member 3                             | Kcnd3         | 323 | Grimm   | NM_001039347 |
| protein kinase C, epsilon                                                                  | Prkce         | 325 | Grimm   | NM_011104    |
| leucine rich repeat containing 3B                                                          | Lrrc3b        | 326 | Grimm   | NM_146052    |
| serine/threonine kinase 39, STE20/SPS1 homolog (yeast)                                     | Stk39         | 327 | Grimm   | NM_016866    |

|                                                                               |               |     |       |              |
|-------------------------------------------------------------------------------|---------------|-----|-------|--------------|
|                                                                               | A030009H04Rik | 328 | Grimm |              |
| DNA segment, Chr 14, ERATO Doi 171, expressed                                 | D14ErtD171e   | 329 | Grimm | NM_177814    |
| glucan (1,4-alpha-), branching enzyme 1                                       | Gbe1          | 330 | Grimm | NM_028803    |
| dehydrogenase/reductase (SDR family) member 3                                 | Dhrs3         | 331 | Grimm | NM_011303    |
| kelch-like 13 (Drosophila)                                                    | Klh13         | 332 | Grimm | NM_026167    |
| aurora kinase A                                                               | Aurka         | 333 | Grimm | NM_011497    |
| LIM domain only 4                                                             | Lmo4          | 334 | Grimm | NM_010723    |
| phospholipase C, beta 1                                                       | Plcb1         | 335 | Grimm | NM_019677    |
| cytochrome b-561                                                              | Cyb561        | 336 | Grimm | NM_007805    |
| CUG triplet repeat, RNA binding protein 2                                     | Cugbp2        | 337 | Grimm | NM_010160    |
| latrophilin 2                                                                 | Lphn2         | 338 | Grimm | XM_888040    |
| protein tyrosine phosphatase, receptor type, U                                | Ptpru         | 340 | Grimm | NM_011214    |
|                                                                               | BC065085      | 341 | Grimm |              |
| solute carrier organic anion transporter family, member 4a1                   | Slco4a1       | 342 | Grimm | NM_148933    |
| cadherin 13                                                                   | Cdh13         | 343 | Grimm | NM_019707    |
| serine (or cysteine) peptidase inhibitor, clade E, member 2                   | Serpine2      | 344 | Grimm | NM_009255    |
|                                                                               | Plekha7       | 345 | Grimm |              |
| angiominin-like 1                                                             | Amotl1        | 348 | Grimm | XM_919481    |
| pre B-cell leukemia transcription factor 1                                    | Pbx1          | 349 | Grimm | NM_008783    |
| ets variant gene 5                                                            | Etv5          | 351 | Grimm | NM_023794    |
|                                                                               | D330050I23Rik | 352 | Grimm |              |
| Purkinje cell protein 4-like 1                                                | Pcp4l1        | 353 | Grimm | XM_484933    |
| endothelial differentiation, lysophosphatidic acid G-protein-coupled receptor | Edg2          | 354 | Grimm | NM_010336    |
| teashirt zinc finger family member 1                                          | Tshz1         | 355 | Grimm | XM_888252    |
| glutamate receptor interacting protein 2                                      | Grip2         | 356 | Grimm | XM_001000130 |
| par-3 (partitioning defective 3) homolog (C. elegans)                         | Pard3         | 357 | Grimm | NM_001013580 |
| Ras association (RalGDS/AF-6) domain family 6                                 | Rassf6        | 358 | Grimm | NM_028478    |
| eyes absent 2 homolog (Drosophila)                                            | Eya2          | 359 | Grimm | NM_010165    |
|                                                                               | 2700045P11Rik | 360 | Grimm |              |
| AT motif binding factor 1                                                     | Atbf1         | 361 | Grimm | NM_007496    |
| solute carrier family 31, member 1                                            | Slc31a1       | 362 | Grimm | NM_175090    |
| rhodopsin                                                                     | Rho           | 363 | Grimm | NM_145383    |
| glycoprotein (transmembrane) nmb                                              | Gpnmb         | 364 | Grimm | NM_053110    |
| Ca <sup>2+</sup> -dependent activator protein for secretion 2                 | Cadps2        | 365 | Grimm | NM_153163    |
| fatty acid desaturase 3                                                       | Fads3         | 366 | Grimm | NM_021890    |
| calcium-sensing receptor                                                      | Casr          | 368 | Grimm | NM_013803    |

|                                                                                    |               |     |        |              |
|------------------------------------------------------------------------------------|---------------|-----|--------|--------------|
| transmembrane inner ear                                                            | Tmie          | 370 | Grimm  | NM_146260    |
| glutathione peroxidase 3                                                           | Gpx3          | 371 | Grimm  | NM_008161    |
| RIKEN cDNA A930038C07 gene                                                         | A930038C07Rik | 372 | Grimm  | NM_172399    |
| fibronectin type III domain containing 3B                                          | Fndc3b        | 373 | Grimm  |              |
| protein phosphatase 1, regulatory (inhibitor) subunit 14B                          | Ppp1r14b      | 374 | Grimm  | NM_008889    |
| myosin Vb                                                                          | Myo5b         | 376 | Grimm  | NM_201600    |
| phosphofructokinase, liver, B-type                                                 | Pfkl          | 377 | Grimm  | NM_008826    |
| thyroid transcription factor 1                                                     | Titf1         | 378 | Grimm  | NM_009385    |
| claudin 1                                                                          | Cldn1         | 379 | Grimm  | NM_016674    |
| guanine nucleotide binding protein (G protein), gamma 11                           | Gng11         | 380 | Grimm  | NM_025331    |
| scrapie responsive gene 1                                                          | Scrg1         | 381 | Grimm  | NM_009136    |
| X-box binding protein 1                                                            | Xbp1          | 382 | Grimm  | NM_013842    |
| G protein-coupled receptor, family C, group 5, member A                            | Gprc5a        | 384 | Grimm  | NM_181444    |
| phosphoglucomutase 2-like 1                                                        | Pgm2l1        | 387 | Grimm  |              |
| regulator of G-protein signaling 2                                                 | Rgs2          | 388 | Grimm  |              |
| cytochrome P450, family 51                                                         | Cyp51         | 2   | Greene | NM_020010    |
| ubiquitin carboxy-terminal hydrolase L1                                            | Uchl1         | 31  | Greene | NM_011670    |
| brain derived neurotrophic factor                                                  | Bdnf          | 57  | Greene | NM_001048139 |
| pyruvate dehydrogenase E1 alpha 1                                                  | Pdha1         | 119 | Greene | NM_008810    |
| phospholipase C, beta 4                                                            | PLCB4         | 232 | Greene | NM_013829    |
| lysophospholipase 1                                                                | Lypla1        | 233 | Greene | NM_008866    |
| solute carrier family 24 (sodium/potassium/calcium exchanger), member 2            | Slc24a2       | 234 | Greene |              |
| ATPase, Ca <sup>++</sup> transporting, cardiac muscle, slow twitch 2               | Atp2a2        | 235 | Greene | NM_009722    |
| calpain, small subunit 1                                                           | Capns1        | 236 | Greene | NM_009795    |
| inositol 1,4,5-triphosphate receptor 1                                             | Itpr1         | 237 | Greene | NM_010585    |
| cysteine rich protein 2                                                            | Crip2         | 238 | Greene | NM_024223    |
| dynein cytoplasmic 1 intermediate chain 1                                          | Dync1i1       | 239 | Greene | NM_010063    |
| ubiquinol-cytochrome c reductase, Rieske iron-sulfur polypeptide 1                 | UQCRC1        | 240 | Greene | NM_025710    |
| ATP synthase, H <sup>+</sup> transporting, mitochondrial F1 complex, alpha subunit | Atp5a1        | 241 | Greene | NM_007505    |
| glutamate oxaloacetate transaminase 2, mitochondrial                               | Got2          | 242 | Greene | NM_010325    |
| pyruvate kinase, muscle                                                            | Pkm2          | 243 | Greene | NM_011099    |
| creatine kinase, brain                                                             | Ckb           | 244 | Greene | NM_021273    |
| adenylate kinase 1                                                                 | Ak1           | 245 | Greene | NM_021515    |
| guanine nucleotide binding protein, alpha o                                        | Gnao1         | 246 | Greene | NM_010308    |
| enolase 3, beta muscle                                                             | Eno3          | 247 | Greene | NM_007933    |
| dopamine receptor 2                                                                | Drd2          | 248 | Greene | NM_010077    |

|                                                                                  |               |     |        |              |
|----------------------------------------------------------------------------------|---------------|-----|--------|--------------|
| calcium channel, voltage-dependent, T type, alpha 1G subunit                     | Cacna1g       | 249 | Greene | NM_009783    |
| protein kinase C, beta 1                                                         | Prkcb1        | 250 | Greene | NM_008855    |
| protein kinase, cAMP dependent regulatory, type II beta                          | Prkar2b       | 252 | Greene | NM_011158    |
| proprotein convertase subtilisin/kexin type 2                                    | Pcsk2         | 255 | Greene | NM_008792    |
| neuritin 1                                                                       | Nrn1          | 256 | Greene | NM_153529    |
| monoamine oxidase A                                                              | Maoa          | 257 | Greene | NM_173740    |
| GTP cyclohydrolase 1                                                             | Gch1          | 258 | Greene | NM_008102    |
| solute carrier family 7 (cationic amino acid transporter, y+ system), member 7   | Slc7a3        | 259 | Greene | NM_007515    |
| cathepsin D                                                                      | Ctsd          | 263 | Greene | NM_009983    |
| vesicle-associated membrane protein 2                                            | Vamp2         | 264 | Greene | NM_009497    |
|                                                                                  | Tle1          | 395 | Greene |              |
|                                                                                  | Grb10         | 396 | Greene |              |
|                                                                                  | Tom1l2        | 397 | Greene |              |
|                                                                                  | A230083H22Rik | 398 | Greene |              |
| calbindin-28K                                                                    | Calb1         | 6   | Chung  | NM_009788    |
| guanosine diphosphate (GDP) dissociation inhibitor 2                             | Gdi2          | 18  | Chung  | NM_008112    |
| longevity assurance homolog 4                                                    | Lass4         | 26  | Chung  | NM_026058    |
| microtubule-associated protein 1 light chain 3 alpha                             | Map1lc3a      | 27  | Chung  | NM_025735    |
| nuclear receptor interacting protein 3                                           | Nrip3         | 34  | Chung  | NM_020610    |
| CD24a antigen                                                                    | Cd24a         | 35  | Chung  | NM_009846    |
| RAB3C, member RAS oncogene family                                                | Rab3c         | 36  | Chung  | NM_023852    |
| acyl-CoA synthetase long-chain family member 6                                   | Acsf6         | 45  | Chung  | NM_001033597 |
| myosin Va                                                                        | Myo5a         | 105 | Chung  | NM_010864    |
| RAR-related orphan receptor alpha                                                | Rora          | 134 | Chung  |              |
| syndecan 2                                                                       | Sdc2          | 141 | Chung  | NM_008304    |
| fibroblast growth factor 1                                                       | Fgf1          | 171 | Chung  | NM_010197    |
| poliovirus receptor-related 3                                                    | Pvrl3         | 172 | Chung  | NM_021495    |
| glutamate receptor, ionotropic, NMDA2C (epsilon 3)                               | Grin2c        | 173 | Chung  | NM_010350    |
| zinc finger, DHHC domain containing 2                                            | Zdhhc2        | 174 | Chung  | NM_178395    |
| cytochrome P450, family 4, subfamily v, polypeptide 3                            | Cyp4v3        | 175 | Chung  | NM_133969    |
| special AT-rich sequence binding protein 1                                       | Satb1         | 176 | Chung  | NM_009122    |
| acetyl-Coenzyme A dehydrogenase, long-chain                                      | Acadl         | 177 | Chung  | NM_007381    |
| solute carrier family 25 (mitochondrial carrier, adenine nucleotide transporter) | Slc25a5       | 178 | Chung  | NM_007451    |
| vav 3 oncogene                                                                   | Vav3          | 179 | Chung  | NM_020505    |
| calcium channel, voltage dependent, alpha2/delta subunit 3                       | Cacna2d3      | 180 | Chung  | NM_009785    |
| synuclein, gamma                                                                 | Sncg          | 181 | Chung  | NM_011430    |

|                                                                          |         |     |       |              |
|--------------------------------------------------------------------------|---------|-----|-------|--------------|
| oxysterol binding protein-like 11                                        | Osbp11  | 182 | Chung | NM_176840    |
| limb expression 1 homolog (chicken)                                      | Lix1    | 183 | Chung | NM_025681    |
| annexin A1                                                               | Anxa1   | 184 | Chung |              |
| Ca <sup>2+</sup> -dependent activator protein for secretion              | Cadps   | 186 | Chung | NM_001042617 |
| RAS-like, family 11, member B                                            | Rasl11b | 187 | Chung | NM_026878    |
| polymerase (DNA directed), beta                                          | Polb    | 188 | Chung |              |
| cyclin I                                                                 | Ccni    | 189 | Chung | NM_017367    |
| RNA terminal phosphate cyclase domain 1                                  | Rtcd1   | 190 | Chung | NM_025517    |
| lysosomal-associated protein transmembrane 4B                            | Laptm4b | 192 | Chung | NM_033521    |
| cadherin 8                                                               | Cdh8    | 193 | Chung | NM_001039154 |
| ganglioside-induced differentiation-associated-protein 1                 | Gdap1   | 194 | Chung | NM_010267    |
| adenosine kinase                                                         | Adk     | 195 | Chung | NM_134079    |
| t-complex-associated-testis-expressed 1-like                             | Tcte1l  | 196 | Chung |              |
| aspartyl aminopeptidase                                                  | Dnpep   | 197 | Chung | NM_016878    |
| regulator of G-protein signaling 8                                       | Rgs8    | 199 | Chung | NM_026380    |
| pre B-cell leukemia transcription factor 3                               | Pbx3    | 200 | Chung | NM_016768    |
| trophoblast glycoprotein                                                 | Tpbpg   | 201 | Chung | NM_011627    |
| CDP-diacylglycerol synthase (phosphatidate cytidyltransferase) 2         | Cds2    | 202 | Chung | NM_138651    |
| myocyte enhancer factor 2A                                               | Mef2a   | 203 | Chung | NM_001033713 |
| mitogen activated protein kinase 9                                       | Mapk9   | 204 | Chung | NM_016961    |
| F-box only protein 2                                                     | Fbxo2   | 205 | Chung | NM_176848    |
| macrophage migration inhibitory factor                                   | Mif     | 206 | Chung | NM_010798    |
| NADH dehydrogenase (ubiquinone) Fe-S protein 8                           | Ndufs8  | 207 | Chung | NM_144870    |
| ELOVL family member 6, elongation of long chain fatty acids (yeast)      | Elovl6  | 208 | Chung | NM_130450    |
| CD47 antigen (Rh-related antigen, integrin-associated signal transducer) | Cd47    | 209 | Chung | NM_010581    |
| citrate synthase                                                         | Cs      | 210 | Chung | NM_026444    |
| phosphatidylinositol transfer protein alpha                              | Pitpna  | 211 | Chung | NM_008850    |
| homer homolog 2 (Drosophila)                                             | Homer2  | 212 | Chung | NM_011983    |
| RASD family, member 2                                                    | Rasd2   | 213 | Chung | XM_204287    |
| thioredoxin domain containing 14                                         | Txndc14 | 215 | Chung | NM_025868    |
| 3-oxoacid CoA transferase 1                                              | Oxct1   | 216 | Chung | NM_024188    |
| translocase of outer mitochondrial membrane 20 homolog (yeast)           | Tomm20  | 217 | Chung | NM_024214    |
| N-ethylmaleimide sensitive fusion protein attachment protein beta        | Napb    | 218 | Chung | NM_019632    |
| amyloid beta (A4) precursor protein-binding, family A, member 2          | Apba2   | 219 | Chung | NM_007461    |
| NIMA (never in mitosis gene a)-related expressed kinase 7                | Nek7    | 221 | Chung | NM_021605    |
| vacuolar protein sorting 35                                              | Vps35   | 222 | Chung | NM_022997    |

|                                                                                     |               |     |         |           |
|-------------------------------------------------------------------------------------|---------------|-----|---------|-----------|
| RAB6, member RAS oncogene family                                                    | Rab6          | 223 | Chung   | NM_024287 |
| very low density lipoprotein receptor                                               | Vldlr         | 224 | Chung   | NM_013703 |
| GTPase activating protein 24                                                        | Arhgap24      | 226 | Chung   | NM_029270 |
| visinin-like 1                                                                      | Vsnl1         | 227 | Chung   | NM_012038 |
| protein tyrosine phosphatase, non-receptor type 5                                   | Ptpn5         | 228 | Chung   | NM_013643 |
| prohibitin 2                                                                        | Phb2          | 229 | Chung   | NM_007531 |
| NADH dehydrogenase (ubiquinone) Fe-S protein 2                                      | Ndufs2        | 230 | Chung   | NM_153064 |
| transducin-like enhancer of split 3, homolog of Drosophila E(spl)                   | Tle3          | 231 | Chung   | NM_009389 |
| tachykinin receptor 3                                                               | Tacr3         | 254 | Chung   | NM_021382 |
| serine protease inhibitor, Kunitz type 2                                            | Spint2        | 262 | Chung   | NM_011464 |
| colony stimulating factor 2 receptor, beta 2, low-affinity (granulocyte-macrophage) | Csf2rb2       | 266 | Chung   | NM_007781 |
| reticulocalbin 1                                                                    | Rcn1          | 267 | Chung   | NM_009037 |
| procollagen, type XI, alpha 1                                                       | Col11a1       | 268 | Chung   |           |
| FXD domain-containing ion transport regulator 6                                     | Fxd6          | 269 | Chung   | NM_022004 |
| calbindin 2                                                                         | Calb2         | 270 | Chung   | NM_007586 |
| MARCKS-like 1                                                                       | Marcksl1      | 271 | Chung   | NM_010807 |
| cholecystokinin                                                                     | Cck           | 272 | Chung   | NM_031161 |
| mesoderm development candidate 2                                                    | Mesdc2        | 273 | Chung   | NM_023403 |
| RIKEN cDNA 9130213B05 gene                                                          | 9130213B05Rik | 274 | Chung   | NM_145562 |
| RIKEN cDNA 9130005N14 gene                                                          | 9130005N14Rik | 275 | Chung   |           |
| huntingtin-associated protein 1                                                     | Hap1          | 276 | Chung   | NM_010404 |
| SWI/SNF related, matrix associated, actin dependent regulator of chromatin          | Smarca1       | 277 | Chung   | NM_053123 |
| dedicator of cytokinesis 6                                                          | Dock6         | 278 | Chung   |           |
| CaM kinase-like vesicle-associated                                                  | Camkv         | 279 | Chung   | NM_145621 |
| isocitrate dehydrogenase 1 (NADP+), soluble                                         | Idh1          | 280 | Chung   | NM_010497 |
| nucleobindin 2                                                                      | Nucb2         | 281 | Chung   | NM_016773 |
| ribosomal protein L36a                                                              | Rpl36a        | 282 | Chung   | NM_019865 |
| lipoprotein lipase                                                                  | Lpl           | 339 | Chung   | NM_008509 |
| adenylate cyclase activating polypeptide 1                                          | Adcyap1       | 347 | Chung   | NM_009625 |
| G substrate                                                                         | Gsbs          | 385 | Chung   | NM_011153 |
| cDNA sequence BC005537                                                              | BC005537      | 30  | Barrett | NM_024473 |
| coiled-coil domain containing 91                                                    | Ccdc91        | 40  | Barrett | NM_025911 |
| cadherin 11                                                                         | Cdh11         | 41  | Barrett | NM_009866 |
| myeloid/lymphoid or mixed-lineage leukemia (trithorax homolog, Drosophila)          | Mllt11        | 48  | Barrett | NM_019914 |
| acidic ribosomal phosphoprotein P0                                                  | Arbp          | 49  | Barrett | NM_007475 |
| chimerin 1                                                                          | Chn1          | 62  | Barrett | NM_029716 |



|                                                                          |            |     |         |              |
|--------------------------------------------------------------------------|------------|-----|---------|--------------|
| in locus of hypothetical protein D230050A05                              | D230050A05 | 68  | Barrett | NM_177585    |
| transmembrane protein 30A                                                | Tmem30a    | 69  | Barrett | NM_133718    |
| drebrin 1                                                                | Dbn1       | 70  | Barrett | NM_019813    |
| deleted in colorectal carcinoma                                          | dcc        | 71  | Barrett | NM_007831    |
| delta/notch-like EGF-related receptor                                    | Dner       | 74  | Barrett | NM_152915    |
| lute carrier family 10 (sodium/bile acid cotransporter family), member 4 | Slc10a4    | 75  | Barrett | NM_173403    |
| eukaryotic translation elongation factor 1 alpha 1                       | Eef1a1     | 76  | Barrett | NM_010106    |
| fatty acid binding protein 5, epidermal                                  | Fabp5      | 78  | Barrett | NM_010634    |
| coagulation factor II (thrombin) receptor                                | F2r        | 79  | Barrett | NM_010169    |
| farnesyl diphosphate farnesyl transferase 1                              | Fdft1      | 80  | Barrett | NM_010191    |
| farnesyl diphosphate synthetase                                          | Fdps       | 81  | Barrett | NM_134469    |
| hepatocyte nuclear factor 3 alpha                                        | foxa1      | 82  | Barrett | NM_008259    |
| four and a half LIM domains 1                                            | fhl1       | 83  | Barrett | NM_001077361 |
| growth associated protein 43                                             | Gap43      | 84  | Barrett | NM_008083    |
| heat shock factor binding protein 1                                      | Hsbp1      | 87  | Barrett | NM_024219    |
| iduronate 2-sulfatase                                                    | Ids        | 88  | Barrett | NM_001038990 |
| limbic system-associated membrane protein                                | Lsamp      | 94  | Barrett | NM_175548    |
| itogen activated protein kinase 1                                        | Mapk11     | 96  | Barrett | NM_011161    |
| microtubule-associated protein tau                                       | Mapt       | 97  | Barrett | NM_001038609 |
| matrin 3                                                                 | Matr3      | 99  | Barrett | NM_010771    |
| mortality factor 4 like 2                                                | Morf4l2    | 101 | Barrett | NM_019768    |
| ybe mortality factor 4 like 1                                            | Morf4l1    | 102 | Barrett | NM_001039147 |
| NADH dehydrogenase (ubiquinone) 1 alpha subcomplex 10                    | Ndufa10    | 108 | Barrett | NM_024197    |
| n-myc downstream regulated 3                                             | Ndrp3      | 109 | Barrett | NM_013865    |
| neural precursor cell expressed, developmentally down-regulated gene 4   | Nedd4      | 110 | Barrett | NM_010890    |
| nicolin 1                                                                | Nicn1      | 111 | Barrett | NM_025449    |
| nuclear receptor subfamily 4, group A, member 2                          | Nr4a2      | 112 | Barrett | NM_013613    |
| TrkB, neurotrophic tyrosine kinase, receptor, type 2                     | Ntrk2      | 113 | Barrett | NM_001025074 |
| neurexin III                                                             | Nrxn3      | 115 | Barrett | NM_172544    |
| progesterone receptor membrane component 1                               | Pgrmc1     | 120 | Barrett | NM_016783    |
| phosphoglycerate kinase 1                                                | Pgk1       | 121 | Barrett | NM_008828    |
| PQ loop repeat containing 1                                              | Pqlc1      | 124 | Barrett | NM_025861    |
| protein phosphatase 3, regulatory subunit B, alpha isoform (calcineurin) | Ppp3r1     | 125 | Barrett | NM_024459    |
| RNA binding motif protein 4                                              | Rbm4       | 130 | Barrett | NM_009032    |
| RNA binding motif protein 18                                             | Rbm18      | 131 | Barrett | NM_026434    |
| ring finger protein 7                                                    | Rnf7       | 133 | Barrett | NM_011279    |

|                                                                        |                 |     |         |              |
|------------------------------------------------------------------------|-----------------|-----|---------|--------------|
| ataxin 10                                                              | Atxn10          | 138 | Barrett | NM_016843    |
| secretogranin II                                                       | Scg2            | 139 | Barrett | NM_009129    |
| succinate dehydrogenase complex, subunit B, iron sulfur (Ip)           | Sdhb            | 143 | Barrett | NM_023374    |
| single-stranded DNA binding protein 2                                  | Ssbp2           | 153 | Barrett | NM_024186    |
| translocase of inner mitochondrial membrane 10 homolog (yeast)         | Timm10          | 159 | Barrett | NM_013899    |
| serine incorporator 1                                                  | Serinc1         | 160 | Barrett | NM_019760    |
| ubiquitin-conjugating enzyme E2B, RAD6 homology (S. cerevisiae)        | Ube2b           | 165 | Barrett | NM_009458    |
| valosin containing protein                                             | Vcp             | 167 | Barrett | NM_009503    |
| tyrosine 3-monooxygenase/tryptophan 5-monooxygenase activation pro     | Ywhae           | 168 | Barrett | NM_009536    |
| tyrosine 3-monooxygenase/tryptophan 5-monooxygenase activation pro     | Ywhab           | 169 | Barrett | NM_018753    |
| SH3-binding domain glutamic acid-rich protein like                     | Sh3bgrl         | 220 | Barrett | NM_019989    |
| chaperonin subunit 5 (epsilon)                                         | Cct5            | 367 | Barrett | NM_007637    |
|                                                                        | 5730410E15Rik   | 391 | Barrett |              |
| ADP-ribosylation factor-like 5A                                        | Arl5a           | 4   |         |              |
| asparagine-linked glycosylation 2 homolog                              | Alg2            | 5   |         | NM_019998    |
| calcium channel, voltage-dependent, beta 2 subunit                     | Cacnb2          | 7   |         | NM_023116    |
| carbonic anhydrase 4                                                   | Car4            | 8   |         | NM_007607    |
| dickkopf homolog 3                                                     | Dkk3            | 10  |         | NM_015814    |
| dystrophia myotonia-containing WD repeat motif                         | Dmwd            | 11  |         | NM_010058    |
| Eph receptor A6                                                        | Epha6           | 12  |         | NM_007938    |
| expressed in non-metastatic cells 1, protein                           | Nme1            | 13  |         | NM_008704    |
| glutamate receptor, ionotropic, kainate 3                              | Grik3           | 14  |         | XM_131647    |
| glutamate receptor, ionotropic, kainate 3                              | Grik3           | 15  |         | XM_131647    |
| heme oxygenase (decycling) 2                                           | Hmox2           | 17  |         | NM_010443    |
| histone 3, H2a                                                         | Hist3h2a        | 19  |         | NM_178218    |
| HIV-1 tat interactive protein 2, homolog (human)                       | Htatip2         | 20  |         | NM_016865    |
| mannoside acetylglucosaminyltransferase 5, isoenzyme B                 | Mgat5b          | 21  |         | NM_172948    |
| RIKEN cRIKEN cDNA 9630033F20 gene DNA 9630033F20 gene                  | 9630033F20Rik   | 25  |         |              |
| ribosomal protein L11                                                  | Rpl11           | 28  |         | NM_025919    |
| huntingtin interacting protein 2                                       | Hip2            | 29  |         | NM_016786    |
| zinc finger, MYND domain containing 11                                 | Zmynd11         | 32  |         | NM_144516    |
| potassium inwardly-rectifying channel, subfamily J, member 6           | Kcnj6           | 33  |         | NM_001025584 |
| 4-aminobutyrate aminotransferase                                       | Abat            | 43  |         |              |
| solute carrier family 6 (neurotransmitter transporter, dopamine), memb | Slc6a3 (or DAT) | 148 |         | NM_010020    |
|                                                                        | Timm8a          | 162 |         |              |
| SH3-binding kinase 1                                                   | Sbk1            | 185 |         | NM_145587    |

|                                                                  |          |     |           |
|------------------------------------------------------------------|----------|-----|-----------|
| myelocytomatosis oncogene                                        | Myc      | 285 | NM_010849 |
| nerve growth factor receptor (TNFR superfamily, member 16)       | Ngfr     | 286 | NM_033217 |
| nucleoporin 93                                                   | Nup93    | 287 | NM_172410 |
| protocadherin alpha 10                                           | Pcdha10  | 288 | NM_009961 |
| protein phosphatase 2, regulatory subunit B (B56), delta isoform | Ppp2r5d  | 289 | NM_009358 |
| receptor accessory protein 1                                     | Reep1    | 290 | NM_178608 |
| ribophorin I                                                     | Rpn1     | 291 | NM_133933 |
| septin 5                                                         | Sept5    | 293 | NM_213614 |
| solute carrier family 35, member C2                              | Slc35c2  | 294 | NM_144893 |
| SET domain containing (lysine methyltransferase) 7               | Setd7    | 295 | NM_080793 |
| SNF related kinase                                               | Snrk     | 296 | NM_133741 |
| single stranded DNA binding protein 4                            | Ssbp4    | 297 | NM_133772 |
| suppressor of Ty 5 homolog (S. cerevisiae)                       | Supt5h   | 298 | NM_013676 |
| serine/threonine kinase 32C                                      | Stk32c   | 299 | NM_021302 |
| testis enhanced gene transcript                                  | Tegt     | 301 | NM_026669 |
| transmembrane protein 50B                                        | Tmem50b  | 302 | NM_030018 |
| tousled-like kinase 1                                            | Tlk1     | 303 | NM_172664 |
| transformation related protein 53 binding protein 1              | Trp53bp1 | 304 | NM_013735 |
| tetraspanin 6                                                    | Tspan6   | 305 |           |
