# Supplementary material for: Linkage of cDNA expression profiles of mesencephalic dopaminergic neurons to a genome-wide in situ hybridization database
Source: PubMed Central journal article supplement (PMC2637272; doi:10.1186/1750-1326-4-6), 2009-01-29
Supplement: 1750-1326-4-6-S2.pdf [file 1750-1326-4-6-S2.pdf]

|            | TOTAL      | SN/VT      | % of total | Barrett   | Chung     | Greene    | Grimm      | Steward   | Thuret    |
|------------|------------|------------|------------|-----------|-----------|-----------|------------|-----------|-----------|
| Barrett    | 199        | 57         | 29%        | <b>57</b> | 3         | 4         | 3          | 11        | 1         |
| Chung      | 383        | 95         | 25%        |           | <b>95</b> | 12        | 15         | 4         | 4         |
| Greene     | 137        | 51         | 37%        |           |           | <b>51</b> | 10         | 3         | 0         |
| Grimm      | 412        | 100        | 24%        |           |           |           | <b>100</b> | 3         | 2         |
| Steward    | 273        | 76         | 28%        |           |           |           |            | <b>76</b> | 2         |
| Thuret     | 119        | 29         | 24%        |           |           |           |            |           | <b>29</b> |
| All Screen | <b>606</b> | <b>341</b> | <b>56%</b> |           |           |           |            |           |           |
