# Supplementary material for: Linkage of cDNA expression profiles of mesencephalic dopaminergic neurons to a genome-wide in situ hybridization database
Source: PubMed Central journal article supplement (PMC2637272; doi:10.1186/1750-1326-4-6), 2009-01-29
Supplement: 1750-1326-4-6-S3.pdf [file 1750-1326-4-6-S3.pdf]

|     |             |     |          |     |         |     |          |     |           |     |         |     |           |
|-----|-------------|-----|----------|-----|---------|-----|----------|-----|-----------|-----|---------|-----|-----------|
| No. | Gene Symbol | 101 | Cacng5   | 202 | Dpysl5  | 303 | Gyg      | 404 | Mast4     | 505 | Ppap2b  | 606 | Slc6a9    |
| 1   | Abat        | 102 | Cacng7   | 203 | Drd2    | 304 | Hap1     | 405 | mCG140667 | 506 | Ppfibp1 | 607 | Slc8a3    |
| 2   | Abhd3       | 103 | Cacybp   | 204 | Dscr111 | 305 | Hars2    | 406 | Mdfi      | 507 | Pqlc1   | 608 | Slc9a9    |
| 3   | Ablim3      | 104 | Cadps2   | 205 | Dusp10  | 306 | Hcn2     | 407 | Megf10    | 508 | Prdx1   | 609 | Slco3a1   |
| 4   | Acat2       | 105 | Cage1    | 206 | Dusp5   | 307 | Hcrtr1   | 408 | Megf11    | 509 | Prkcd   | 610 | Sncg      |
| 5   | Ache        | 106 | Calb2    | 207 | Ece2    | 308 | Hdc      | 409 | Meis1     | 510 | Prkg1   | 611 | Socs6     |
| 6   | Acsbg1      | 107 | Calcb    | 208 | Ecel1   | 309 | Hes3     | 410 | Mesdc2    | 511 | Prmt2   | 612 | Sod1      |
| 7   | Acsl3       | 108 | Calcr    | 209 | Edc3    | 310 | Hip1     | 411 | Mfap5     | 512 | Prokr2  | 613 | Sp8       |
| 8   | Actr10      | 109 | Calml3   | 210 | Edg1    | 311 | Hmgcs1   | 412 | Mlstd1    | 513 | Prrg2   | 614 | Sparc     |
| 9   | Acyp2       | 110 | Capn2    | 211 | Ednrb   | 312 | Hod      | 413 | Mm.271301 | 514 | Psmd5   | 615 | Spata13   |
| 10  | Adamts19    | 111 | Car10    | 212 | Eif5a2  | 313 | Homer2   | 414 | Mrg1      | 515 | Psme1   | 616 | Spp1      |
| 11  | Adamts2     | 112 | Car2     | 213 | Elavl2  | 314 | Hrasls3  | 415 | Mrg2      | 516 | Psme2   | 617 | Sptlc2    |
| 12  | Adamts4     | 113 | Car4     | 214 | Elov15  | 315 | Hspa4l   | 416 | Mrpl39    | 517 | Pstpip1 | 618 | Sqle      |
| 13  | Adarb1      | 114 | Car7     | 215 | Elov16  | 316 | Icmt     | 417 | Msi2      | 518 | Ptgds   | 619 | Srgap1    |
| 14  | Adarb2      | 115 | Cart     | 216 | En2     | 317 | Idh1     | 418 | Msto1     | 519 | Ptpn2   | 620 | Srprb     |
| 15  | Adcy4       | 116 | Casq2    | 217 | Endod1  | 318 | Igfbp5   | 419 | Mtap4     | 520 | Ptpn4   | 621 | Ssbp2     |
| 16  | Adcy8       | 117 | Casr     | 218 | Entpd3  | 319 | Igsf3    | 420 | Mtrr      | 521 | Ptprm   | 622 | St8sia1   |
| 17  | Adcyap1     | 118 | Cast     | 219 | Eomes   | 320 | Il13ra1  | 421 | Mtss1     | 522 | Ptpro   | 623 | Stac      |
| 18  | Adcyap1r1   | 119 | Ccdc91   | 220 | Ephb1   | 321 | Il16     | 422 | Mum1l1    | 523 | Ptpr    | 624 | Stat5b    |
| 19  | Adipor1     | 120 | Cd81     | 221 | Epn3    | 322 | Impact   | 423 | Myt1      | 524 | Ptprz1  | 625 | Steap2    |
| 20  | AF529169    | 121 | Cda      | 222 | Erbp4   | 323 | Impg2    | 424 | Nab1      | 525 | Ptrf    | 626 | Stk17b    |
| 21  | Agc1        | 122 | Cdc42ep1 | 223 | Ero1lb  | 324 | Inhba    | 425 | Ndn       | 526 | Pvalb   | 627 | Stmn3     |
| 22  | Agt         | 123 | Cdgap    | 224 | Esrrg   | 325 | Inpp4b   | 426 | Ndrp2     | 527 | Pvr     | 628 | Stx3      |
| 23  | Agtr1b      | 124 | Cdh15    | 225 | Etv1    | 326 | Inpp5a   | 427 | Ndufb8    | 528 | Pygb    | 629 | Sv2c      |
| 24  | Agxt2l1     | 125 | Cdh4     | 226 | Evi5    | 327 | Insig1   | 428 | Ndufs1    | 529 | Qdpr    | 630 | Syne2     |
| 25  | AI427515    | 126 | Cdh8     | 227 | Exph5   | 328 | Iqsec3   | 429 | Nefh      | 530 | Rab37   | 631 | Syt10     |
| 26  | AI450948    | 127 | Cdkn1a   | 228 | F2r     | 329 | Irs4     | 430 | Nell1     | 531 | Rab3c   | 632 | Syt6      |
| 27  | AI836003    | 128 | Cdkn2b   | 229 | Fabp5   | 330 | Isoc1    | 431 | Neurl     | 532 | Raf1    | 633 | Syt9      |
| 28  | Akap12      | 129 | Cdr2     | 230 | Fabp7   | 331 | Itga3    | 432 | Neurod1   | 533 | Rasa2   | 634 | Tacr3     |
| 29  | Akap13      | 130 | Cerk     | 231 | Fbn2    | 332 | Itgb1    | 433 | Nfil3     | 534 | Rasa4   | 635 | Tal1      |
| 30  | Akap2       | 131 | Chd7     | 232 | Fbxo9   | 333 | Itgb1bp1 | 434 | Nfyc      | 535 | Rassf8  | 636 | Tbl3      |
| 31  | Akr1b3      | 132 | Chml     | 233 | Fdft1   | 334 | Itih3    | 435 | Ngb       | 536 | Raver2  | 637 | TC1410973 |
| 32  | Aldh1a1     | 133 | Chn2     | 234 | Fdps    | 335 | Jam2     | 436 | Nhlh2     | 537 | Rax     | 638 | TC1517215 |
| 33  | Aldh1l1     | 134 | Chrm2    | 235 | Fgd3    | 336 | Jup      | 437 | Nhlrc1    | 538 | Rbed1   | 639 | TC1563370 |
| 34  | Aldh5a1     | 135 | Chrm5    | 236 | Fgf13   | 337 | Kbtbd3   | 438 | Nifun     | 539 | Rbpms2  | 640 | TC1563688 |
| 35  | Aldoc       | 136 | Chrna3   | 237 | Flt3l   | 338 | Kcnb2    | 439 | Nmb       | 540 | Rcn2    | 641 | TC1568600 |
| 36  | Alg2        | 137 | Chrna4   | 238 | Fmo1    | 339 | Kcnc1    | 440 | Nola3     | 541 | Reln    | 642 | Tcf2      |
| 37  | Alkbh6      | 138 | Chrna5   | 239 | Fn1     | 340 | Kcnc2    | 441 | Nova1     | 542 | Resp18  | 643 | Tex261    |
| 38  | Alox8       | 139 | Chrna6   | 240 | Fndc5   | 341 | Kcnd2    | 442 | Npffr2    | 543 | Rfk     | 644 | Tgfb1     |
| 39  | Amigo2      | 140 | Chrb3    | 241 | Fos     | 342 | Kcnd3    | 443 | Npr1      | 544 | Rfx4    | 645 | Th        |
| 40  | Amot        | 141 | Chst8    | 242 | Fryl    | 343 | Kcng4    | 444 | Nrg1      | 545 | Rgs3    | 646 | Thra      |
| 41  | Amotl1      | 142 | Cib2     | 243 | Fst     | 344 | Kcnip1   | 445 | Nrip3     | 546 | Rgs8    | 647 | Tiam1     |
| 42  | Ank1        | 143 | Clcn5    | 244 | Fstl5   | 345 | Kcnip4   | 446 | Nrsn2     | 547 | Rhobtb3 | 648 | Tm2d3     |
| 43  | Ankrd24     | 144 | Cldn11   | 245 | Fts     | 346 | Kcnk1    | 447 | Nt5m      | 548 | Rnd2    | 649 | Tm2d3     |

|    |          |     |              |     |         |     |           |     |         |     |           |     |         |
|----|----------|-----|--------------|-----|---------|-----|-----------|-----|---------|-----|-----------|-----|---------|
| 44 | Ankrd38  | 145 | Clgn         | 246 | Fut8    | 347 | Kcnk13    | 448 | Ntn1    | 549 | Rnf13     | 650 | Tm6sf1  |
| 45 | Anln     | 146 | Clic4        | 247 | Fzd8    | 348 | Kcns3     | 449 | Ntsr1   | 550 | Rnh1      | 651 | Tm6sf1  |
| 46 | Anxa2    | 147 | Clmn         | 248 | Gaa     | 349 | Kctd9     | 450 | Nxn     | 551 | Rorc      | 652 | Tmed3   |
| 47 | Apba1    | 148 | Clptm1l      | 249 | Gabra6  | 350 | Kifc3     | 451 | Nxph4   | 552 | Rpl11     | 653 | Tmem130 |
| 48 | Apbb2    | 149 | Cmb1         | 250 | Gabre   | 351 | Kit       | 452 | Og9x    | 553 | Rps12     | 654 | Tmem163 |
| 49 | Apc      | 150 | Cnksr3       | 251 | Gabrq   | 352 | Kitl      | 453 | Opn3    | 554 | Rps5      | 655 | Tmem16f |
| 50 | Aqp2     | 151 | Cnp1         | 252 | Gad1    | 353 | Klhl1     | 454 | Optn    | 555 | Rragd     | 656 | Tmem22  |
| 51 | Aqp4     | 152 | Cntn6        | 253 | Gad2    | 354 | Klhl4     | 455 | Osbp19  | 556 | Rwdd2     | 657 | Tmem29  |
| 52 | Arhgap12 | 153 | Cntnap3      | 254 | Gal     | 355 | Klk6      | 456 | Ostf1   | 557 | S100a10   | 658 | Tmem33  |
| 53 | Arhgap5  | 154 | Cntnap4      | 255 | Galnt10 | 356 | L1cam     | 457 | P2ry6   | 558 | S100a16   | 659 | Tmem41a |
| 54 | Arhgdig  | 155 | Col11a1      | 256 | Galnt13 | 357 | Lamb1-1   | 458 | P4ha2   | 559 | S100b     | 660 | Tmem47  |
| 55 | Arl10    | 156 | Col18a1      | 257 | Galnt6  | 358 | Lancl3    | 459 | Pacs2   | 560 | Sacm1l    | 661 | Tmem64  |
| 56 | Arl2     | 157 | Col24a1      | 258 | Gata3   | 359 | Lcat      | 460 | Pacsin2 | 561 | Samd14    | 662 | Tmie    |
| 57 | Arl5a    | 158 | Col27a1      | 259 | Gatm    | 360 | Lef1      | 461 | Pappa2  | 562 | Sap30l    | 663 | Tnc     |
| 58 | Armc2    | 159 | Col5a3       | 260 | Gbe1    | 361 | Lgi3      | 462 | Paqr8   | 563 | Sash1     | 664 | Tnfaip8 |
| 59 | Arntl    | 160 | Col9a1       | 261 | Gcg     | 362 | Lgr5      | 463 | Park2   | 564 | Sc4mol    | 665 | Tnrc6a  |
| 60 | Arx      | 161 | Cops4        | 262 | Gch1    | 363 | Lhfp      | 464 | Pax6    | 565 | Sc5d      | 666 | Tns1    |
| 61 | Asb4     | 162 | Coro2b       | 263 | Gchfr   | 364 | Lhx1      | 465 | Pax7    | 566 | Scarb2    | 667 | Tob2    |
| 62 | Ascl1    | 163 | Cox6c        | 264 | Gdf11   | 365 | Lhx5      | 466 | Pbx3    | 567 | Scd2      | 668 | Tpd52l1 |
| 63 | Astn2    | 164 | Cpne2        | 265 | Gdpd2   | 366 | Limk1     | 467 | Pcbp3   | 568 | Scd3      | 669 | Tph2    |
| 64 | Asxl3    | 165 | Creg1        | 266 | Gfra1   | 367 | Lip1      | 468 | Pcdh18  | 569 | Scg2      | 670 | Trh     |
| 65 | Atbf1    | 166 | Crhr1        | 267 | Ghsr    | 368 | Lix1      | 469 | Pcdh21  | 570 | Scube2    | 671 | Trim36  |
| 66 | Atf3     | 167 | Crhr2        | 268 | Gja1    | 369 | Lmx1b     | 470 | Pcdh9   | 571 | Sdc2      | 672 | Tshz1   |
| 67 | Atic     | 168 | Csdc2        | 269 | Gja7    | 370 | Lnx2      | 471 | Pcp2    | 572 | Sema3c    | 673 | Tspan11 |
| 68 | Atp10a   | 169 | Csk          | 270 | Gja9    | 371 | LOC244958 | 472 | Pcsk1n  | 573 | Sema3d    | 674 | Tspan12 |
| 69 | Atp11c   | 170 | Cspg2        | 271 | Gldc    | 372 | LOC270764 | 473 | Pcsk6   | 574 | Sema3f    | 675 | Tspan15 |
| 70 | Atp8a2   | 171 | Ctbp2        | 272 | Glra1   | 373 | LOC381076 | 474 | Pdcl    | 575 | Sema4d    | 676 | Tspan2  |
| 71 | AU040377 | 172 | Cthrc1       | 273 | Glra3   | 374 | LOC432637 | 475 | Pde4d   | 576 | Sema4g    | 677 | Tspan6  |
| 72 | AW049765 | 173 | Ctnnbip1     | 274 | Glul    | 375 | LOC433088 | 476 | Pde9a   | 577 | Sema6a    | 678 | Ttbk2   |
| 73 | B3gnt5   | 174 | Ctsl         | 275 | Gm1335  | 376 | LOC433093 | 477 | Pdxk    | 578 | Sema6c    | 679 | Tubb4   |
| 74 | B4galt1  | 175 | Cygb         | 276 | Gm69    | 377 | LOC433228 | 478 | Pdzd8   | 579 | Sema6d    | 680 | Tulp4   |
| 75 | B4galt5  | 176 | Cyp27a1      | 277 | Gng11   | 378 | LOC433254 | 479 | Peg10   | 580 | Serpinb1c | 681 | Txnrd3  |
| 76 | Bace2    | 177 | Cyp51        | 278 | Gng13   | 379 | LOC433258 | 480 | Phactr2 | 581 | Serpine2  | 682 | Ube1l2  |
| 77 | Baiap3   | 178 | D0H4S114     | 279 | Gng2    | 380 | LOC433485 | 481 | Phactr4 | 582 | Sez6l2    | 683 | Ublcp1  |
| 78 | BC004044 | 179 | D11Erttd333e | 280 | Gng4    | 381 | LOC545810 | 482 | Phf6    | 583 | Sgpp2     | 684 | Ugt8a   |
| 79 | BC025816 | 180 | D8Erttd82e   | 281 | Gpc3    | 382 | Loh11cr2a | 483 | Pias4   | 584 | Sh3bgrl2  | 685 | Unc5b   |
| 80 | BC029169 | 181 | Dad1         | 282 | Gpc6    | 383 | Loxl1     | 484 | Pib5pa  | 585 | Sh3d19    | 686 | Unc5c   |
| 81 | BC030477 | 182 | Dbh          | 283 | Gpr165  | 384 | Lpin1     | 485 | Pkia    | 586 | Shb       | 687 | Utp14b  |
| 82 | BC031353 | 183 | Dbi          | 284 | Gpr171  | 385 | Lrig1     | 486 | Pknox1  | 587 | Sla       | 688 | Vangl1  |
| 83 | BC051227 | 184 | Ddc          | 285 | Gpr37l1 | 386 | Lrp8      | 487 | Plcb4   | 588 | Slc10a4   | 689 | Vat1    |
| 84 | BC054438 | 185 | Ddc8         | 286 | Gpr56   | 387 | Lrrc1     | 488 | Plcd1   | 589 | Slc12a8   | 690 | Veph1   |
| 85 | BC057022 | 186 | Ddt          | 287 | Gpr98   | 388 | Lrrc3b    | 489 | Plcl1   | 590 | Slc17a6   | 691 | Vim     |
| 86 | Bcat1    | 187 | Decr1        | 288 | Gprc5b  | 389 | Lrrc55    | 490 | Plekha2 | 591 | Slc17a8   | 692 | Vipr2   |
| 87 | Bckdhb   | 188 | Depdc6       | 289 | Gpx3    | 390 | Lrsam1    | 491 | Plekha7 | 592 | Slc18a2   | 693 | Vps39   |

|     |          |     |         |     |         |     |         |     |         |     |         |     |         |
|-----|----------|-----|---------|-----|---------|-----|---------|-----|---------|-----|---------|-----|---------|
| 88  | Bmp5     | 189 | Dexi    | 290 | Grb10   | 391 | Ltbp3   | 492 | Plekhg1 | 593 | Slc18a3 | 694 | Wnt10a  |
| 89  | Brunol6  | 190 | Dhcr24  | 291 | Grid2   | 392 | Lxn     | 493 | Plekhh2 | 594 | Slc20a2 | 695 | Wnt10b  |
| 90  | Btbd11   | 191 | Dip3b   | 292 | Grid2ip | 393 | Lypla1  | 494 | Plp1    | 595 | Slc22a3 | 696 | Wnt3    |
| 91  | Btbd3    | 192 | Dlat    | 293 | Grin2c  | 394 | Lzp-s   | 495 | Pltp    | 596 | Slc32a1 | 697 | Wrb     |
| 92  | Btg1     | 193 | Dlk1    | 294 | Grin1a  | 395 | Mad11l1 | 496 | Plxdc1  | 597 | Slc34a1 | 698 | Zcchc12 |
| 93  | Btg2     | 194 | Dlx1    | 295 | Grm1    | 396 | Maged2  | 497 | Plxdc2  | 598 | Slc38a1 | 699 | Zfhx2as |
| 94  | C1ql2    | 195 | Dlx6os1 | 296 | Grm4    | 397 | Magel2  | 498 | Plxnb2  | 599 | Slc38a3 | 700 | Zfhx4   |
| 95  | C85492   | 196 | Dnahc11 | 297 | Grp     | 398 | Manba   | 499 | Pmfbp1  | 600 | Slc41a3 | 701 | Zfp521  |
| 96  | C85492   | 197 | Dnajc12 | 298 | Gsn     | 399 | Maoa    | 500 | Pnpo    | 601 | Slc5a7  | 702 | Zic1    |
| 97  | Cables2  | 198 | Dnm3    | 299 | Gstm4   | 400 | Maob    | 501 | Podxl2  | 602 | Slc6a11 | 703 | Zim1    |
| 98  | Cacna2d2 | 199 | Doc2g   | 300 | Gucy2c  | 401 | Map2k5  | 502 | Pogk    | 603 | Slc6a2  |     |         |
| 99  | Cacnb2   | 200 | Dock6   | 301 | Gucy2f  | 402 | Map2k6  | 503 | Pogz    | 604 | Slc6a3  |     |         |
| 100 | Cacng4   | 201 | Dpysl3  | 302 | Guk1    | 403 | Masp1   | 504 | Pon3    | 605 | Slc6a4  |     |         |
