# Supplementary material for: Linkage of cDNA expression profiles of mesencephalic dopaminergic neurons to a genome-wide in situ hybridization database
Source: PubMed Central journal article supplement (PMC2637272; doi:10.1186/1750-1326-4-6), 2009-01-29
Supplement: 1750-1326-4-6-S4.pdf [file 1750-1326-4-6-S4.pdf]

|     |         |    |         |    |         |    |         |
|-----|---------|----|---------|----|---------|----|---------|
| No. | Symbol  | 18 | Chrna4  | 36 | Homer2  | 54 | Rcn2    |
| 1   | Abat    | 19 | Chrn3   | 37 | Idh1    | 55 | Rgs8    |
| 2   | Acs13   | 20 | Col11a1 | 38 | Impact  | 56 | Rpl11   |
| 3   | Adcyap1 | 21 | Ddc     | 39 | Kcnd3   | 57 | Sacm1l  |
| 4   | Akr1b3  | 22 | Dock6   | 40 | Lix1    | 58 | Scg2    |
| 5   | Aldh1a1 | 23 | Drd2    | 41 | Lrrc3b  | 59 | Sdc2    |
| 6   | Alg2    | 24 | Elovl6  | 42 | Lypla1  | 60 | Sema6d  |
| 7   | Amotl1  | 25 | Erbb4   | 43 | Maoa    | 61 | Slc10a4 |
| 8   | Arl5a   | 26 | Fabp5   | 44 | Mesdc2  | 62 | Slc18a2 |
| 9   | Atbf1   | 27 | Fdft1   | 45 | Mtap4   | 63 | Slc6a3  |
| 10  | Cacnb2  | 28 | Fdps    | 46 | Nrip3   | 64 | Sncg    |
| 11  | Cadps2  | 29 | Gbe1    | 47 | Pbx3    | 65 | Ssbp2   |
| 12  | Calb2   | 30 | Gfra1   | 48 | Pkia    | 66 | Tacr3   |
| 13  | Calm3   | 31 | Gng11   | 49 | PLCB4   | 67 | Th      |
| 14  | Car4    | 32 | Gpx3    | 50 | Plekha7 | 68 | Tmie    |
| 15  | Casr    | 33 | Grb10   | 51 | Pqlc1   | 69 | Tshz1   |
| 16  | Ccdc91  | 34 | Grin2c  | 52 | Prmt2   | 70 | Tspan6  |
| 17  | Cdh8    | 35 | Hap1    | 53 | Rab3c   |    |         |
